# Supplementary material
Source: Research Square preprint supplement (doi:10.21203/rs.3.rs-10116498/v1)
Supplement: Supplementary file 1 [file 6c4c3778d4194564faf3d5d8.docx]

Table 1. Proportion of ingredients and chemical composition used in the diet of dairy cows

| Ingredients (%DM)/ Treatments1 | CONT | SO | TN | TN + SO | |
| --- | --- | --- | --- | --- | --- |
| Corn silage | 60.00% | 60.00% | 60.00% | | 60.00% |
| Finely ground corn | 18.25% | 15.45% | 17.09% | | 14.23% |
| Soybean meal | 18.35% | 18.84% | 18.51% | | 19.01% |
| Mineral-Topmilk Matsuda nucleus2 | 2,00% | 2.00% | 2.00% | | 2.00% |
| Supplement _ Fortmix2 | 1,40% | 1.40% | 1.40% | | 1.40% |
| Sunflower oil | 0.00% | 2.31% | 0.00% | | 2.36% |
| Condensed tannin (Nutriset TNT)3 | 0.00% | 0.00% | 1,00% | | 1.00% |
| Dry matter (g/kg) | 513.61 | 514.15 | 513,41 | | 480.36 |
| Organic matter (g/kg DM) | 987.40 | 963.50 | 976.50 | | 963.10 |
| Crude protein (g/kg DM) | 156.30 | 156.90 | 156.50 | | 156.90 |
| Ether extract (g/kg DM) | 59.70 | 82.86 | 59.60 | | 83.39 |
| Neutral detergent fiber (g/kg DM) | 372.40 | 362.70 | 365.70 | | 369.60 |
| Acid detergent fiber (g/kg DM) | 222.80 | 231.50 | 230.20 | | 229.50 |
| Non-fibrous carbohydrate (g/kg DM) | 399.00 | 361.00 | 394.70 | | 353.20 |
| Mineral matter (g/kg DM) | 149.60 | 131.20 | 135.50 | | 140.01 |
| Estimated TDN4 (g/kg DM) | 717.01 | 720.76 | 719.60 | | 718.10 |

1CONT = Control; SO = effect of the addition of sunflower oil; TN = effect of the addition of condensed tannin; TN + SO = effect of the interaction between tannin and oil.

2Matsuda Grupo -https://www.matsuda.com.br - top-milk-nucleo.

## 2Fortmixnutricaoanimal - FortMix Nutrição Animal - [Cassilândia - MS,](https://maps.app.goo.gl/XCUmRdKnPKZwANN96) Brazil.

3Nutriset TNT.

4TDN= Total digestible nutrientes.

| Table 2. Concentration of fatty acids (g 100g⁻¹ of total fatty acids) in sunflower oil | | | | |
| --- | --- | --- | --- | --- |
| Fatty acids1 | Oil Sunflower |  |  |  | |
| C16:0 – Palmitic acid | 6.69 |  |  |  | |
| C18:0 – Stearic acid | 4.11 |  |  |  | |
| C18:1n-9 – Oleic acid | 21.09 |  |  |  | |
| C18:2 – Linoleic acid | 68.06 |  |  |  | |
| C18:3n3-c9, c12,c15 - Alpha-linolenic acid | 0.12 |  |  |  | |
| Saturated fatty acids | 10.68 |  |  |  | |
| Monounsaturated fatty acids | 21.02 |  |  |  | |
| Polyunsaturated fatty acids | 68.19 |  |  |  | |

1Composition of the main fatty acids of sunflower oil.Table 3. Milk production and composition of dairy cows fed diets containing or not containing condensed tannins and/or sunflower oil

|  |  | |  | | |  |  | | |  | | *p2* | |
| --- | --- | --- | --- | --- | --- | --- | --- | --- | --- | --- | --- | --- | --- |
| Treatments1 | CONT | SO | | TN | TN+SO | | | SEM2 | TN | | SO | | INT |
| Milk production (L/d) | 16,32 | 15,63 | | 15,86 | 15,43 | | | 2,16 | 0,530 | | 0,290 | | 0,80 |
| MPC-3.5%3 (L/d) | 16,97 | 14,95 | | 16,17 | 14,93 | | | 2,55 | 0,520 | | 0,010 | | 0,530 |
| Fat (%) | 3,74 | 3,24 | | 3,59 | 3,31 | | | 0,51 | 0,730 | | 0,002 | | 0,340 |
| Protein (%) | 3,42 | 3,34 | | 3,46 | 3,28 | | | 0,20 | 0,880 | | 0,007 | | 0,290 |
| Lactose (%) | 4,43 | 4,37 | | 4,52 | 4,38 | | | 0,39 | 0,510 | | 0,2000 | | 0,620 |
| Num4 (mg/dL) | 14,6 | 11,70 | | 13,72 | 11,46 | | | 3,67 | 0,280 | | <0,0001 | | 0,530 |
| CCS log105 | 1,89 | 2,22 | | 2,09 | 2,17 | | | 0,54 | 0,500 | | 0,080 | | 0,270 |

1CONT = Control; SO = effect of the addition of sunflower oil; TN = effect of the addition of condensed tannin; TN + SO = effect of the interaction between tannin and oil.

2 SEM = standard error of the mean.

3MPC-3.5%= Milk production corrected to 35 g/kg of fat. = (0,432 + 0,1625 x g/kg fat) × milk production (kg/day) (Sklan et al., 1992).

4MUN = milk urea nitrogen.

5SCC = somatic cell count, base 10 logarithm.

Table 4. Antioxidant levels in the milk of dairy cows fed diets containing or not containing condensed tannins and/or sunflower oil

|  |  | | |  | |  | |  | | |  | | *p2* | |
| --- | --- | --- | --- | --- | --- | --- | --- | --- | --- | --- | --- | --- | --- | --- |
| Treatments1 | | CONT | SO | | TN | | TN+SO | | EPM1 | TN | | SO | | INT |
| 3TBARS (mmol/kg) fat) | | 4.30 | 4.82 | | 4.11 | | 3.74 | | 1.04 | 0.53 | | 0.940 | | 0.660 |
| 4DC  (mmol/kg fat) | | 27.37 | 47.79 | | 28.26 | | 45.39 | | 2.20 | 0.72 | | <0.0001 | | 0.550 |
| 5ABTS  (mmol/kg fat) | | 177.7 | 178.6 | | 183.9 | | 192.0 | | 6.5 | 0.10 | | 0.480 | | 0.570 |
| 6DPPH  ((µmol/L).) | | 14.57 | 17.78 | | 17.06 | | 14.93 | | 2.71 | 0.94 | | 0.820 | | 0.270 |

1 SEM = standard error of the mean;

2CONT = Control; SO = effect of the addition of sunflower oil; TN = effect of the addition of condensed tannin; TN + SO = effect of the interaction between tannin and oil.

3TBARS: thiobarbituric acid reactive substances (mmol/kg fat).

4DC: conjugated dienes.

5ABTS: thiobarbituric acid reactive substances (nmol.L).

6DPPH - is a method based on the elimination of the stable free radical 1,1-diphenyl-2 picrylhydrazyl.Table 5. Fatty acid profile (g/100 g of fatty acids) in the milk fat of cows fed diets containing or not containing condensed tannins and/or sunflower oil

| Treatmants1 | | | | | p | | | | |
| --- | --- | --- | --- | --- | --- | --- | --- | --- | --- |
| Fatty acids | CONT | SO | TN | TN+SO | | SEM2 | SO | TN | INT3 | |
| C6:0 | 0.448 | 0.349 | 0.427 | 0.516 | | 0.023 | 0.9516 | 0.2252 | 0.0446 | |
| C8:0 | 1.117 | 0.839 | 1.113 | 1.019 | | 0.047 | 0.9516 | 0.4540 | 0.2340 | |
| C10:0 | 7.245 | 4.994 | 6.696 | 5.642 | | 0.251 | 0.0208 | 0.8930 | 0.1041 | |
| C11:0 | 0.523 | 0.379 | 0.508 | 0.418 | | 0.015 | <.0001 | 0.6052 | 0.2494 | |
| C12:0 | 8.315 | 5.816 | 8.158 | 5.782 | | 0.254 | <.0001 | 0.9882 | 0.5608 | |
| C13:0 | 0.368 | 0.275 | 0.370 | 0.300 | | 0.254 | <.0001 | 0.2719 | 0.3703 | |
| C14:0 | 23.003 | 20.118 | 21.428 | 20.111 | | 0.009 | <.0001 | 0.1389 | 0.0600 | |
| C14:1 | 1.715 | 1.418 | 1.707 | 1.674 | | 0.063 | 0.0301 | 0.0974 | 0.0789 | |
| C15:1 | 0.241 | 0.288 | 0.288 | 0.226 | | 0.018 | 0.8128 | 0.1764 | 0.1666 | |
| C16:0 | 35.899 | 30.854 | 35.962 | 30.012 | | 0.496 | <.0001 | 0.5409 | 0.4669 | |
| C16:1 | 0.297 | 0.329 | 0.326 | 0.302 | | 0.011 | 0.7908 | 0.9414 | 0.0720 | |
| C17:0 | 0.023 | 0.031 | 0.018 | 0.029 | | 0.002 | 0.0031 | 0.2942 | 0.5950 | |
| C17:1 | 0.148 | 0.147 | 0.192 | 0.151 | | 0.008 | 0.1408 | 0.1027 | 0.1759 | |
| C18:0 | 7.013 | 10.730 | 7.533 | 10.926 | | 0.330 | <.0001 | 0.3234 | 0.6538 | |
| C18:1 n9t | 0.799 | 3.083 | 0.881 | 2.890 | | 0.190 | <.0001 | 0.7377 | 0.4821 | |
| C18:1 n9c | 12.222 | 18.892 | 13.942 | 18.762 | | 0.631 | <.0001 | 0.3318 | 0.2595 | |
| C18:2 n6t | 0.057 | 0.100 | 0.067 | 0.095 | | 0.004 | <.0001 | 0.6127 | 0.1350 | |
| C18:2 n6c | 0.077 | 0.065 | 0.090 | 0.090 | | 0.005 | 0.3735 | 0.0142 | 0.4152 | |
| C18:3 n6 | 0.084 | 0.101 | 0.108 | 0.096 | | 0.005 | 0.7732 | 0.2908 | 0.1049 | |
| C18:3 n3 | 0.196 | 0.745 | 0.217 | 0.466 | | 0.041 | <.0001 | 0.0052 | 0.0013 | |
| C18:2 c9. t11 | 0.171 | 0.624 | 0.178 | 0.611 | | 0.003 | <.0001 | 0.8641 | 0.8592 | |
| C18:2 t10 cis12 | 0.019 | 0.048 | 0.018 | 0.047 | | 0.002 | <.0001 | 0.8451 | 0.8399 | |
| C20:0 | 0.005 | 0.013 | 0.005 | 0.006 | | 0.001 | 0.0806 | 0.2606 | 0.1810 | |
| C20:1 | 0.063 | 0.058 | 0.078 | 0.052 | | 0.003 | 0.001 | 0.2891 | 0.0151 | |
| C20:2 | 0.009 | 0.009 | 0.011 | 0.006 | | 0.001 | 0.0112 | 0.6658 | 0.0208 | |
| C20:3 n6 | 0.029 | 0.024 | 0.027 | 0.023 | | 0.002 | 0.0960 | 0.5232 | 0.8698 | |
| C20:3 n3 | 0.061 | 0.053 | 0.077 | 0.042 | | 0.004 | 0.0018 | 0.7083 | 0.0337 | |
| C22:0 | 0.018 | 0.019 | 0.025 | 0.016 | | 0.003 | 0.3944 | 0.5694 | 0.1691 | |
| C22:2 | 0.004 | 0.006 | 0.004 | 0.003 | | 0.000 | 0.1345 | 0.0047 | 0.0006 | |

1CONT = Control; SO = effect of the addition of sunflower oil; TN = effect of the addition of condensed tannin; TN + SO = effect of the interaction between tannin and oil.

2SEM = standard error of the mean.

3NT = effect of the interaction between tannin and oil.

Table 6. Values of short-chain fatty acids (SCFA). medium-chain fatty acids (MCFA). long-chain fatty acids (LCFA). saturated fatty acids (SFA). Monounsaturated fatty acids (MUFA). polyunsaturated fatty acids (PUFA) in milk fat (mg/g) and ratio SFA/UFA of cows fed diets containing or not condensed tannins and/or sunflower oil

|  |  |  | Treatmants1 |  |  |  | p2 |  |
| --- | --- | --- | --- | --- | --- | --- | --- | --- |
|  | CONT | SO | TN | SO+TN | SEM2 | SO | TN | INT3 |
| SCFA | 8.900 | 6.243 | 8.274 | 7.206 | 0.305 | 0.0003 | 0.7269 | 0.1049 |
| MCFA | 70.209 | 59.350 | 68.585 | 59.202 | 0.892 | <.0001 | 0.3605 | 0.4459 |
| LCFA | 20.821 | 34.104 | 23.290 | 33.333 | 1.080 | <.0001 | 0.4982 | 0.1990 |
| SFA | 83.812 | 74.016 | 81.793 | 74.47 | 0.834 | <.0001 | 0.6592 | 0.2173 |
| MUFA | 15.485 | 24.215 | 17.414 | 24.057 | 0.757 | <.0001 | 0.5490 | 0.1552 |
| PUFA | 0.703 | 1.769 | 0.793 | 1.476 | 0.049 | <.0001 | 0.8641 | 0.8592 |
|  |  |  |  |  |  |  |  |  |

1CONT = Control Diet; TN = Diet containing Tannin; SO = Diet containing Sunflower Oil; Diet containing TN+SO =

2SEM = Standard Error of the Mean; Interaction Effect.

3INT = effect of the interaction between tannin and oil.

Table 7. Purine derivatives in the urine of dairy cows supplemented with diets containing condensed tannins and sunflower oil

|  |  | | |  |  | |  |  | *p2* | | |
| --- | --- | --- | --- | --- | --- | --- | --- | --- | --- | --- | --- |
| Treatments1 | CONT | SO | TN | | TN+SO | SEM2 | | TN | | SO | INT3 |
| Urine production. L/d | 24.63 | 24.06 | 23.53 | | 16.64 | 1.85 | | 0.1099 | | 0.1659 | 0.1192 |
| Microbial protein synthesis /d | 364.21 | 408.67 | 403.67 | | 481.31 | 36.79 | | 0.7285 | | 0.0718 | 0.7628 |
| Microbial N, g/d | 47.18 | 98.01 | 64.83 | | 77.01 | 11.10 | | 0.4635 | | 0.0900 | 0.3830 |
| Creatinine, mg/dL | 6.40 | 5.81 | 5.96 | | 7.58 | 0.57 | | 0.3417 | | 0.4603 | 0.1220 |
| Uric acid, mg/dL | 6.14 | 861 | 5.46 | | 7.60 | 0.54 | | 0.3324 | | 0.0140 | 0.8505 |
| Allantoin, mg/dL | 24.39 | 24.04 | 27.36 | | 33.78 | 2.52 | | 0.0504 | | 0.3299 | 0.2778 |
| Allantoin / Uric acid | 3.96 | 3.00 | 11.93 | | 4.20 | 1.86 | | 0.2295 | | 0.2541 | 0.3722 |
| Uric acid /Creatinine | 1.15 | 1.82 | 1.05 | | 1.08 | 0.15 | | 0.1146 | | 0.1780 | 0.2177 |
| (Allantoin + Uric acid)/Creatinine) | 5.74 | 6.35 | 6.23 | | 5.91 | 0.51 | | 0.9667 | | 0.7978 | 0.4096 |

1CONT = Control Diet; TN = Diet containing Tannin; SO = Diet containing Sunflower Oil.

2SEM = 2SEM = standard error of the mean.

3INT = effect of the interaction between tannin and oil.
